# Supplementary material for: Quantum Mechanical Methods Predict Accurate Thermodynamics of Biochemical Reactions
Source: PubMed Central journal article supplement — ACS Omega. 2021 Mar 25;6(14):9948–59. doi: 10.1021/acsomega.1c00997 (PMC8047721; doi:10.1021/acsomega.1c00997), 2021-03-25
Supplement: ao1c00997_si_001.pdf [file ao1c00997_si_001.pdf]

**Supplementary Information:**  
**Quantum Mechanical Methods Predict Accurate  
Thermodynamics of Biochemical Reactions**

Rajendra P. Joshi,<sup>†</sup> Andrew McNaughton,<sup>†</sup> Dennis G. Thomas,<sup>†</sup> Christopher S.  
Henry,<sup>‡</sup> Shane R. Canon,<sup>¶</sup> Lee Ann McCue,<sup>†</sup> and Neeraj Kumar<sup>\*,†</sup>

<sup>†</sup>*Pacific Northwest National Laboratory, Richland, WA 99352, United States*

<sup>‡</sup>*Argonne National Laboratory, 9700 S Cass Ave, Lemont, IL 60439, United States*

<sup>¶</sup>*Lawrence Berkeley National Laboratory, 1 Cyclotron Rd, Berkeley, CA 94720, United  
States*

E-mail: neeraj.kumar@pnnl.gov

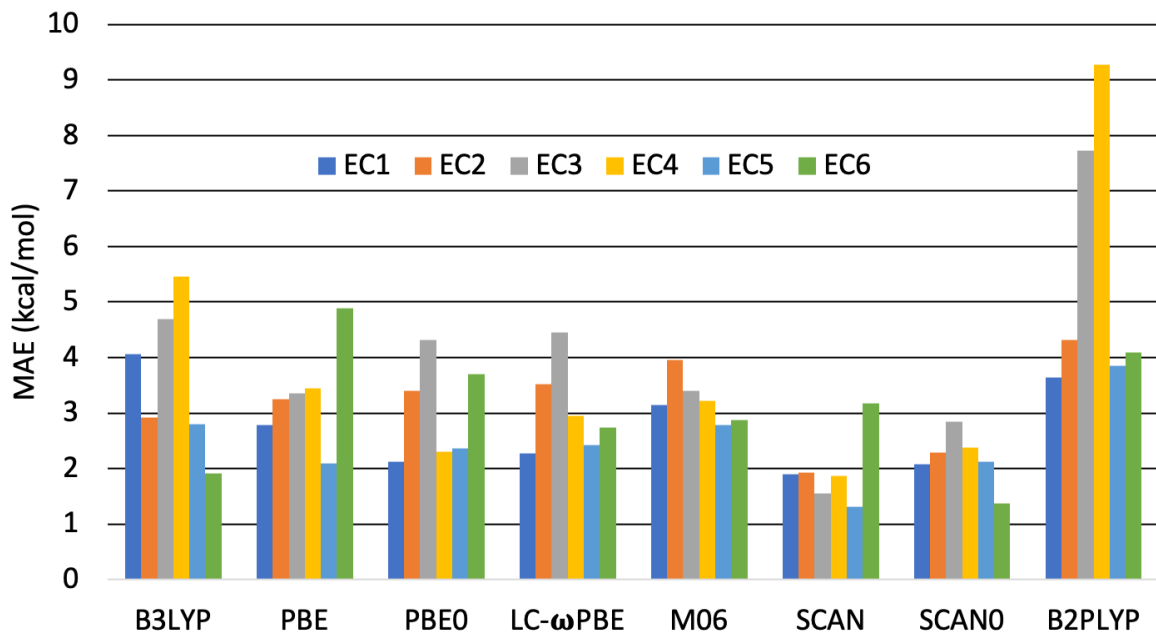

Figure S1: Bar plot showing performance of different exchange correlation functionals in DFT for each EC category. Error in reaction free energy are calculated with respect to experimental reference.

## Regression parameters

Regression parameters used for each type of calibration;

Entire data:  $y=0.38x+0.84$ ,  $R^2 = 0.39$

EC1:  $y=0.50x+2.3$ ,  $R^2 = 0.48$

EC2:  $y=0.22x+0.29$ ,  $R^2 = 0.19$

EC3:  $y=0.19x-1.31$ ,  $R^2 = 0.12$

EC4:  $y=0.34x+1.54$ ,  $R^2 = 0.31$

EC5:  $y=0.10x-0.09$ ,  $R^2 = 0.19$

EC6:  $y=0.58x+0.40$ ,  $R^2 = 0.28$

Table S1: Different reactions in tricarboxylic acid cycle (TCA)/glycolysis.

| EC-Numbers | Reaction                                                                                                         |
|------------|------------------------------------------------------------------------------------------------------------------|
| TCA cycle  |                                                                                                                  |
| 2.3.3.1    | oxaloacetate+H <sub>2</sub> O+acetyl-CoA = citrate+CoA+PROTON                                                    |
| 4.2.1.3    | citrate = H <sub>2</sub> O+cis-aconitate                                                                         |
| 4.2.1.3    | cis-aconitate + H <sub>2</sub> O = D-threo-isocitrate                                                            |
| 1.1.1.41   | D-threo-isocitrate + NAD <sup>+</sup> = 2-oxoglutarate+NADH +CO <sub>2</sub>                                     |
| 1.2.1.M9   | 2-oxoglutarate + CoA + NAD <sup>+</sup> = Succinyl-CoA + NADH + CO <sub>2</sub>                                  |
| 6.2.1.5    | succinyl-CoA + ADP + phosphate=ATP + CoA+succinate                                                               |
| 1.3.5.1    | succinate + FAD = FADH <sub>2</sub> + fumarate                                                                   |
| 4.2.1.2    | fumarate + H <sub>2</sub> O = malate                                                                             |
| 1.1.1.37   | malate + NAD <sup>+</sup> = NADH + oxaloacetate + PROTON                                                         |
| glycolysis |                                                                                                                  |
| 5.3.1.9    | D-glucopyranose 6-phosphate = β-D-fructofuranose 6-phosphate                                                     |
| 3.1.3.11   | β-D-fructofuranose 1, 6-phosphate + H <sub>2</sub> O =<br>β-D-fructofuranose 6-phosphate + phosphate             |
| 2.7.1.11   | ATP + β-D-fructofuranose 6-phosphate =<br>ADP + β-D-fructofuranose 1, 6-phosphate                                |
| 4.1.2.13   | β-D-fructofuranose 1, 6-phosphate =<br>glycerone phosphate + D-glyceraldehyde 3-phosphate                        |
| 1.2.1.12   | D-glyceraldehyde 3-phosphate + NAD <sup>+</sup> + Phosphate<br>= 3-phospho-D-glyceroyl phosphate + NADH + PROTON |
| 2.7.2.3    | 3-phospho-D-glycerate + ATP<br>= ADP + 3-phospho-D-glyceroyl phosphate                                           |
| 5.4.2.11   | 2-phospho-D-glycerate = p3-phospho-D-glycerate                                                                   |
| 5.4.2.12   | 2-phospho-D-glycerate = 3-phospho-D-glycerate                                                                    |
| 4.2.1.11   | 2-phospho-D-glycerate = phosphoenolpyruvate + water                                                              |
| 2.7.9.2    | pyruvate + ATP + H <sub>2</sub> O = AMP + phosphoenolpyruvate + phosphate + water                                |
| 2.7.1.40   | pyruvate+ATP = phosphoenolpyruvate + ADP +PROTON                                                                 |
| 1.2.1.-    | pyruvate + NAD <sup>+</sup> + CoA = acetyl-CoA + NADH + CO <sub>2</sub>                                          |

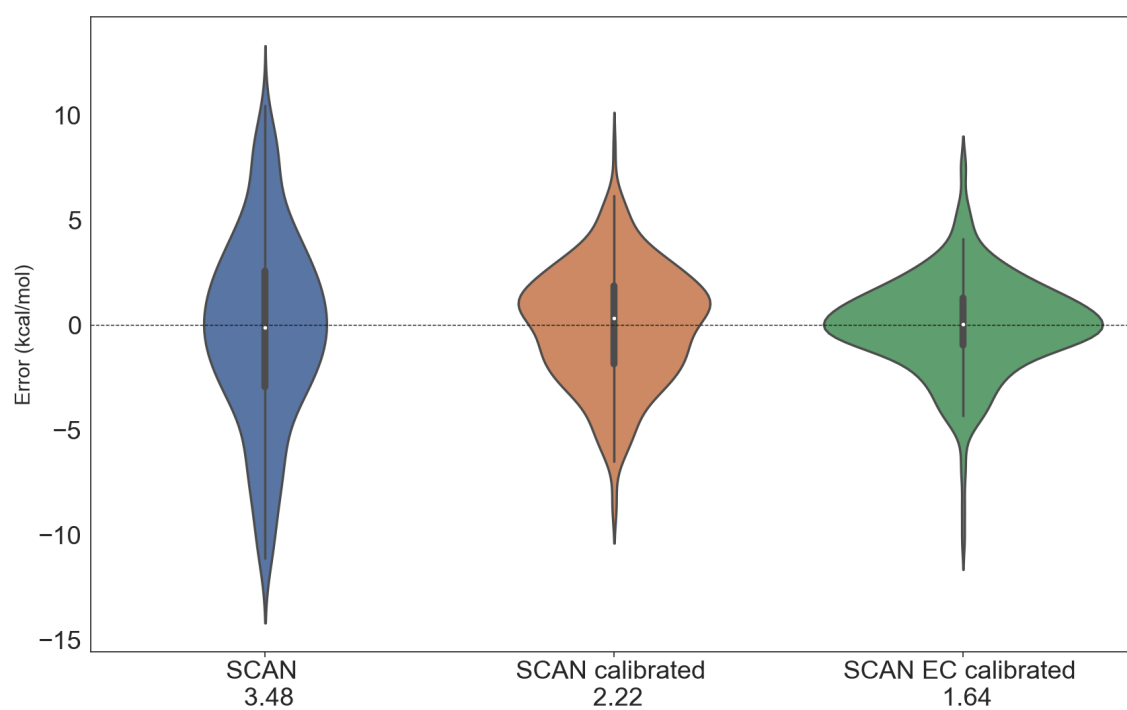

Figure S2: Violin plot showing improvement in calculated SCAN reaction free energies before and after calibration. Label shows the MAE (kcal/mol) obtained for each case.

## Inverse Legendre transformation

Each reaction in NIST experimental data has associated error with it. Such error comes mainly from measurements performed and reported at different experimental condition (pH, ionic strength etc.) for a given reaction. We standardized the NIST experimental data to eliminate the effect of varying experimental condition (or to minimize experimental error) by using inverse Legendre transform.<sup>1</sup> For mathematics to carryout such transformation, we refers readers to pioneering work of Alberty.<sup>1,2</sup> We used pKa values for each metabolite which is calculated using Chemaxon.<sup>3</sup>

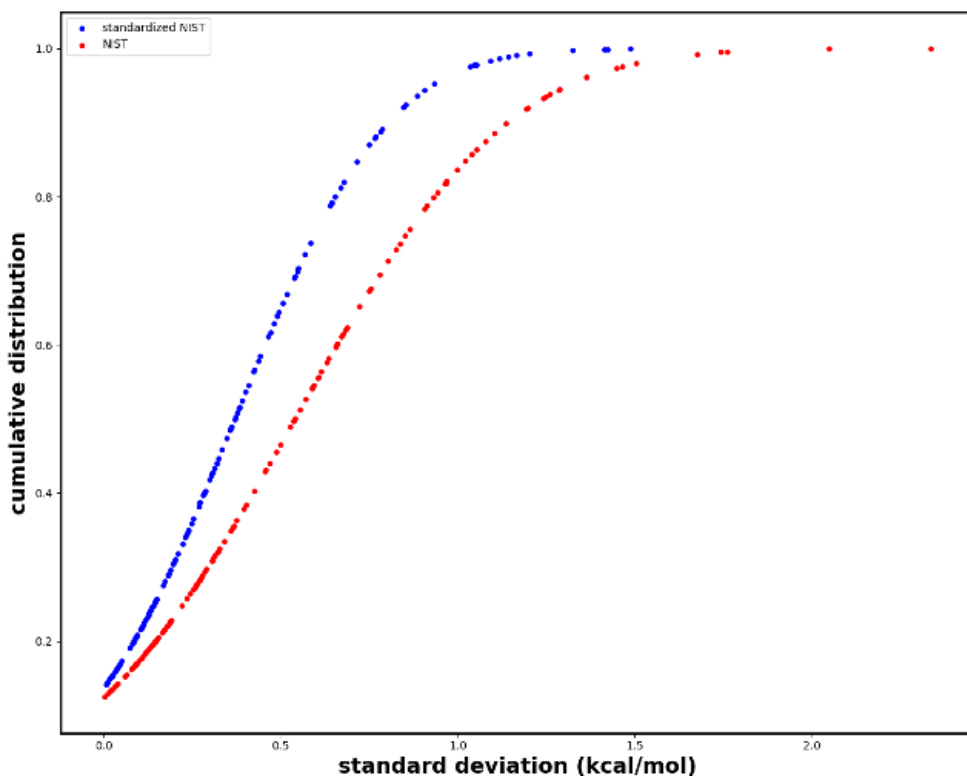

Figure S3: Plot of cumulative distribution functions of the standard deviations in reaction free energy for inverse Legendres transformed (standardized) and for the one directly taken from NIST data. It shows, standardized NIST data have reduced measurement error for each reaction. Only reaction with multiple measurement are considered in this plot.

We note that, inverse Legendre transform does not completely eliminate the condition dependance in NIST experimental data as shown in Figure S3. It however reduces the

mean/median of standard deviation for Set2 from 0.54/0.37 to 0.37/0.28 kcal/mol. We note that, standard deviation is calculated for each reaction in experimentally measured multiple reaction free energies and then mean/median is calculated on entire Set2. Ideally, multiple experimental measurements in NIST data should give a single value for reaction free energy after such transformation. Such ideal situation is not observed after inverse Legendre transformation, thus showing remaining noise in the standardized data, which may arise from measurement errors and inaccuracies in the inverse Legendre transform as discussed by Noor et al.<sup>4</sup> in their work.

## Data

SCAN predicted reaction free energies for each reaction in Set-2 along with corresponding experimental values, error on experimental value, absolute deviation between DFT and experimental values and corresponding reactions are provided.

| EC        | DFT Expt |      | Error | DFT-Expt | Reactions                              |
|-----------|----------|------|-------|----------|----------------------------------------|
| 1.1.1.-   | 8.56     | 7.23 | 0.09  | 1.33     | cpd00795+cpd00003=cpd00024+cpd00004    |
| 1.1.1.1   | 8.35     | 5.73 | 1.16  | 2.62     | cpd00363+cpd00003=cpd00071+cpd00004    |
| 1.1.1.1   | 8.95     | 3.29 | 0.02  | 5.66     | cpd00365+cpd00003=cpd00304+cpd00004    |
| 1.1.1.1   | 5.85     | 5.55 | 0.01  | 0.29     | cpd00435+cpd00003=C00261+cpd00004      |
| 1.1.1.1   | 9.49     | 6.58 | 0.00  | 2.91     | cpd00562+cpd00003=cpd01088+cpd00004    |
| 1.1.1.1   | 4.96     | 2.62 | 0.31  | 2.34     | cpd00636+cpd00003=cpd00329+cpd00004    |
| 1.1.1.1   | 3.05     | 2.30 | 0.09  | 0.75     | cpd01269+cpd00003=cpd00178+cpd00004    |
| 1.1.1.1   | 8.10     | 6.29 | 0.00  | 1.81     | cpd03662+cpd00003=cpd01011+cpd00004    |
| 1.1.1.1   | 8.36     | 6.83 | 0.00  | 1.53     | cpd05400+cpd00003=cpd00613310+cpd00004 |
| 1.1.1.108 | 1.83     | 6.32 | 0.03  | 4.49     | cpd00266+cpd00003=cpd01715+cpd00004    |
| 1.1.1.108 | 1.80     | 6.95 | 0.01  | 5.15     | cpd10719+cpd00003=cpd01715+cpd00004    |
| 1.1.1.125 | 3.80     | 7.43 | 0.00  | 3.63     | cpd01795+cpd00003=cpd02441+cpd00004    |
| 1.1.1.129 | 5.37     | 4.93 | 1.14  | 0.44     | cpd01138+cpd00003=cpd01961+cpd00004    |
| 1.1.1.14  | 3.91     | 5.28 | 0.20  | 1.37     | cpd00306+cpd00003=cpd00259+cpd00004    |
| 1.1.1.14  | 2.02     | 2.60 | 0.08  | 0.57     | cpd00314+cpd00003=cpd00082+cpd00004    |
| 1.1.1.14  | 4.41     | 5.23 | 0.00  | 0.82     | cpd00366+cpd00003=cpd00258+cpd00004    |
| 1.1.1.14  | 3.15     | 3.24 | 0.38  | 0.09     | cpd00588+cpd00003=cpd00082+cpd00004    |
| 1.1.1.14  | 5.16     | 2.54 | 0.00  | 2.62     | cpd01066+cpd00003=cpd00212+cpd00004    |
| 1.1.1.14  | 2.43     | 3.27 | 0.00  | 0.84     | cpd01171+cpd00003=cpd00589+cpd00004    |

| EC        | DFT Expt |       | Error | DFT-Expt | Reactions                                                      |
|-----------|----------|-------|-------|----------|----------------------------------------------------------------|
| 1.1.1.14  | 4.67     | 4.92  | 0.00  | 0.26     | cpd01307+cpd00003=cpd00258+cpd00004                            |
| 1.1.1.140 | 2.99     | 3.79  | 0.00  | 0.80     | cpd00804+cpd00003=cpd00072+cpd00004                            |
| 1.1.1.24  | -2.35    | 4.53  | 0.00  | 6.88     | cpd00248+cpd00003=cpd00699+cpd00004                            |
| 1.1.1.26  | 15.37    | 11.28 | 0.18  | 4.10     | cpd00139+cpd00003=cpd00040+cpd00004                            |
| 1.1.1.26  | 9.92     | 7.99  | 0.25  | 1.94     | cpd00223+cpd00003=cpd00145+cpd00004                            |
| 1.1.1.27  | 11.62    | 7.10  | 0.55  | 4.52     | cpd00159+cpd00003=cpd00020+cpd00004                            |
| 1.1.1.28  | 11.60    | 6.38  | 1.33  | 5.22     | cpd00221+cpd00003=cpd00020+cpd00004                            |
| 1.1.1.29  | 9.92     | 8.17  | 0.32  | 1.76     | cpd00223+cpd00003=cpd00145+cpd00004                            |
| 1.1.1.3   | 8.57     | 4.82  | 0.00  | 3.75     | cpd00227+cpd00003=cpd00346+cpd00004                            |
| 1.1.1.30  | 8.42     | 3.29  | 0.38  | 5.13     | cpd00797+cpd00003=cpd00142+cpd00004                            |
| 1.1.1.31  | 8.17     | 5.71  | 0.36  | 2.46     | cpd00876+cpd00003=cpd00287+cpd00004                            |
| 1.1.1.37  | 11.16    | 7.27  | 0.00  | 3.89     | cpd00023+cpd00130+cpd00003=cpd00041+cpd00024+cpd00004          |
| 1.1.1.37  | 9.21     | 7.63  | 0.36  | 1.57     | cpd00130+cpd00003=cpd00032+cpd00004                            |
| 1.1.1.37  | 11.34    | 7.19  | 0.19  | 4.15     | cpd00432+cpd00003=cpd00718+cpd00004                            |
| 1.1.1.37  | 13.87    | 10.18 | 0.00  | 3.69     | cpd00432+cpd00003=cpd02186+cpd00004                            |
| 1.1.1.39  | 5.99     | 3.53  | 0.00  | 2.46     | cpd00130+cpd00003+cpd00001=cpd00020+cpd00004+cpd00242          |
| 1.1.1.4   | 5.73     | 4.34  | 0.05  | 1.39     | cpd01947+cpd00003=cpd19008+cpd00004                            |
| 1.1.1.47  | -2.65    | -0.66 | 0.77  | 1.99     | cpd00027+cpd00003=cpd00170+cpd00004                            |
| 1.1.1.48  | -6.95    | -3.12 | 0.20  | 3.83     | cpd00108+cpd00003=cpd02143+cpd00004                            |
| 1.1.1.51  | 1.69     | 1.23  | 0.43  | 0.46     | cpd00420+cpd00003=cpd00237+cpd00004                            |
| 1.1.1.56  | 4.41     | 5.01  | 0.55  | 0.60     | cpd00366+cpd00003=cpd00258+cpd00004                            |
| 1.1.1.59  | 10.51    | 6.29  | 0.00  | 4.22     | cpd00745+cpd00003=cpd00191+cpd00004                            |
| 1.1.1.60  | 10.61    | 8.52  | 1.09  | 2.09     | cpd00223+cpd00003=cpd00843+cpd00004                            |
| 1.1.1.62  | -0.82    | 1.77  | 0.04  | 2.59     | cpd00702+cpd00003=cpd00362+cpd00004                            |
| 1.1.1.67  | 2.02     | 3.47  | 1.41  | 1.44     | cpd00314+cpd00003=cpd00082+cpd00004                            |
| 1.1.1.8   | 7.34     | 6.48  | 0.49  | 0.86     | cpd00080+cpd00003=cpd00095+cpd00004                            |
| 1.1.1.9   | 3.91     | 5.37  | 0.30  | 1.45     | cpd00306+cpd00003=cpd00259+cpd00004                            |
| 1.1.1.9   | 4.41     | 5.86  | 0.05  | 1.44     | cpd00366+cpd00003=cpd00258+cpd00004                            |
| 1.1.1.9   | 3.15     | 3.98  | 0.05  | 0.83     | cpd00588+cpd00003=cpd00082+cpd00004                            |
| 1.1.1.9   | 5.16     | 3.97  | 0.05  | 1.19     | cpd01066+cpd00003=cpd00212+cpd00004                            |
| 1.1.1.90  | 5.85     | 5.67  | 0.00  | 0.18     | cpd00435+cpd00003=C00261+cpd00004                              |
| 1.1.1.95  | 15.33    | 8.66  | 1.12  | 6.67     | cpd00169+cpd00003=cpd02069+cpd00004                            |
| 1.1.99.7  | 2.42     | -0.61 | 0.36  | 3.03     | cpd00159+cpd00032=cpd00130+cpd00020                            |
| 1.2.1.12  | -0.56    | -0.55 | 0.67  | 0.01     | cpd00102+cpd00008+cpd00003+cpd00009=cpd00169+cpd00002+cpd00004 |
| 1.2.1.12  | -2.24    | 3.21  | 0.85  | 5.46     | cpd00102+cpd00009+cpd00003=cpd00203+cpd00004                   |
| 1.2.1.2   | 2.00     | -4.27 | 0.00  | 6.27     | cpd00047+cpd00003+cpd00001=cpd00242+cpd00004                   |
| 1.3.99.11 | 6.74     | 3.52  | 0.18  | 3.21     | cpd00282+cpd00003=cpd00247+cpd00004                            |
| 1.4.1.1   | 6.74     | 9.71  | 0.35  | 2.96     | cpd00035+cpd00003+cpd00001=cpd00020+cpd00004+cpd00013          |
| 1.4.1.11  | 1.51     | 4.95  | 1.42  | 3.44     | cpd00874+cpd00003+cpd00001=cpd02294+cpd00004+cpd00013          |
| 1.4.1.12  | 4.35     | 7.73  | 0.00  | 3.38     | cpd02448+cpd00003+cpd00001=cpd02121+cpd00004+cpd00013          |

| EC        | DFT Expt |       | Error | DFT-Expt | Reactions                                             |
|-----------|----------|-------|-------|----------|-------------------------------------------------------|
| 1.4.1.2   | 9.96     | 10.08 | 1.20  | 0.12     | cpd00023+cpd00003+cpd00001=cpd00024+cpd00004+cpd00013 |
| 1.4.1.3   | 9.96     | 9.58  | 0.10  | 0.38     | cpd00023+cpd00003+cpd00001=cpd00024+cpd00004+cpd00013 |
| 1.4.1.9   | 7.98     | 10.02 | 0.00  | 2.04     | cpd00107+cpd00003+cpd00001=cpd00200+cpd00004+cpd00013 |
| 1.5.1.11  | 4.37     | 8.62  | 0.00  | 4.25     | cpd02553+cpd00003+cpd00001=cpd00051+cpd00020+cpd00004 |
| 1.5.1.7   | 7.45     | 10.21 | 0.00  | 2.76     | cpd00351+cpd00003+cpd00001=cpd00039+cpd00024+cpd00004 |
| 1.8.1.4   | 9.35     | 1.78  | 0.46  | 7.56     | cpd00449+cpd00003=cpd00213+cpd00004                   |
| 2.1.2.1   | -9.10    | -4.86 | 0.00  | 4.24     | cpd00033+cpd00055=cpd00054                            |
| 2.1.2.1   | 0.07     | -2.44 | 0.00  | 2.52     | cpd00033+cpd00071=cpd00161                            |
| 2.1.2.7   | 9.76     | 5.05  | 0.00  | 4.71     | cpd01432=cpd00117+cpd00055                            |
| 2.1.2.7   | 9.34     | 5.01  | 0.00  | 4.34     | cpd01958=cpd00550+cpd00055                            |
| 2.1.3.2   | -11.73   | -5.00 | 0.00  | 6.73     | cpd00146+cpd00041=cpd00009+cpd00343                   |
| 2.1.3.3   | -15.03   | -7.61 | 0.00  | 7.42     | cpd00146+cpd00064=cpd00274+cpd00009                   |
| 2.1.4.1   | 2.62     | -0.13 | 0.00  | 2.75     | cpd00051+cpd00033=cpd00064+cpd00451                   |
| 2.2.1.1   | 3.37     | 1.72  | 0.36  | 1.65     | cpd00072+cpd00102=cpd00236+cpd00198                   |
| 2.2.1.1   | 2.56     | 2.48  | 0.00  | 0.08     | cpd00072+cpd00229=cpd01395+cpd00236                   |
| 2.2.1.1   | 6.70     | 0.26  | 0.28  | 6.44     | cpd00238+cpd00102=cpd00101+cpd00198                   |
| 2.2.1.2   | 4.65     | 0.80  | 0.00  | 3.86     | cpd00082+cpd00102=cpd00072+cpd00448                   |
| 2.2.1.2   | 10.71    | 0.26  | 0.37  | 10.45    | cpd00238+cpd00102=cpd00236+cpd00072                   |
| 2.3.1.2   | 9.37     | 1.96  | 0.91  | 7.41     | cpd00196+cpd01116=cpd01677+cpd00009                   |
| 2.3.1.35  | -0.33    | 1.23  | 0.00  | 1.57     | cpd00342+cpd00023=cpd00064+cpd00477                   |
| 2.3.1.8   | -4.01    | -1.97 | 0.00  | 2.04     | cpd00020+cpd00009=cpd00196+cpd00047                   |
| 2.4.1.13  | -7.28    | 0.96  | 0.55  | 8.25     | cpd00026+cpd00082=cpd00014+cpd00076                   |
| 2.4.1.15  | -10.62   | -1.89 | 0.00  | 8.73     | cpd00026+cpd00079=cpd00014+cpd00523                   |
| 2.4.1.20  | 10.11    | 0.75  | 0.14  | 9.37     | cpd00158+cpd00009=cpd00027+cpd00089                   |
| 2.4.1.20  | 4.26     | 0.55  | 0.00  | 3.71     | cpd03721+cpd00009=cpd00158+cpd00089                   |
| 2.4.1.216 | 9.17     | 2.02  | 0.04  | 7.15     | cpd00523+cpd00009=cpd00089+cpd00079                   |
| 2.4.1.31  | 8.24     | 0.58  | 0.00  | 7.66     | cpd01397+cpd00009=cpd00027+cpd00089                   |
| 2.4.1.64  | 3.45     | 1.17  | 0.49  | 2.28     | cpd00794+cpd00009=cpd00027+cpd00089                   |
| 2.4.1.67  | 2.13     | -0.83 | 0.01  | 2.97     | cpd00910+cpd00382=cpd00121+cpd01133                   |
| 2.4.1.7   | 5.83     | -1.94 | 0.13  | 7.78     | cpd00076+cpd00009=cpd00089+cpd00082                   |
| 2.4.1.8   | 0.35     | 0.85  | 0.00  | 0.50     | cpd00179+cpd00009=cpd00027+cpd00089                   |
| 2.4.2.1   | 0.47     | 3.55  | 0.00  | 3.08     | cpd00133+cpd00475=cpd02016+cpd00009                   |
| 2.4.2.1   | -0.06    | 2.09  | 0.78  | 2.14     | cpd00182+cpd00009=cpd00128+cpd00475                   |
| 2.4.2.1   | -4.53    | 2.29  | 0.31  | 6.82     | cpd00246+cpd00009=cpd00226+cpd00475                   |
| 2.4.2.1   | -6.52    | 2.64  | 0.00  | 9.16     | cpd00311+cpd00009=cpd00207+cpd00475                   |
| 2.4.2.1   | -6.35    | 2.47  | 0.00  | 8.82     | cpd01217+cpd00009=cpd00309+cpd00475                   |
| 2.4.2.1   | 5.86     | 2.22  | 0.13  | 3.63     | cpd03279+cpd00009=cpd00226+cpd00509                   |
| 2.4.2.10  | -5.89    | -3.90 | 0.64  | 1.98     | cpd00810+cpd00012=cpd00247+cpd00103                   |
| 2.4.2.11  | -2.27    | 1.89  | 0.00  | 4.16     | cpd00873+cpd00012=cpd00218+cpd00103                   |
| 2.4.2.15  | -6.52    | 2.39  | 0.00  | 8.91     | cpd00311+cpd00009=cpd00207+cpd00475                   |



| EC       | DFT Expt |       | Error | DFT-Expt | Reactions                           |
|----------|----------|-------|-------|----------|-------------------------------------|
| 2.4.2.28 | 2.47     | 2.62  | 0.00  | 0.15     | cpd00147+cpd00009=cpd00128+cpd02574 |
| 2.4.2.6  | -4.58    | -1.71 | 0.00  | 2.87     | cpd00184+cpd00128=cpd00438+cpd00151 |
| 2.4.2.6  | -2.20    | -0.20 | 0.00  | 2.00     | cpd03279+cpd00128=cpd00438+cpd00226 |
| 2.4.2.8  | -2.14    | 8.53  | 0.00  | 10.67    | cpd00114+cpd00012=cpd00226+cpd00103 |
| 2.4.2.8  | -5.52    | 0.55  | 0.00  | 6.07     | cpd00126+cpd00226=cpd00114+cpd00207 |
| 2.4.2.8  | 2.14     | -6.71 | 0.00  | 8.85     | cpd00226+cpd00103=cpd00114+cpd00012 |
| 2.6.1.-  | -5.77    | 0.43  | 0.00  | 6.21     | cpd00035+cpd01504=cpd00020+cpd00726 |
| 2.6.1.1  | -1.95    | 1.04  | 0.18  | 3.00     | cpd00041+cpd00024=cpd00032+cpd00023 |
| 2.6.1.1  | -1.41    | -1.61 | 0.00  | 0.20     | cpd21080+cpd00024=cpd02186+cpd00023 |
| 2.6.1.15 | -1.13    | -3.57 | 0.00  | 2.44     | cpd00053+cpd00020=cpd00695+cpd00035 |
| 2.6.1.15 | -7.04    | -3.82 | 0.00  | 3.21     | cpd00053+cpd00040=cpd00695+cpd00033 |
| 2.6.1.18 | -0.55    | 0.92  | 0.00  | 1.47     | cpd00035+cpd00191=cpd00085+cpd00020 |
| 2.6.1.19 | -0.25    | 1.03  | 0.57  | 1.28     | cpd00281+cpd00024=cpd00199+cpd00023 |
| 2.6.1.2  | -3.22    | -0.23 | 0.25  | 2.99     | cpd00035+cpd00024=cpd00020+cpd00023 |
| 2.6.1.21 | -3.23    | 0.01  | 0.00  | 3.24     | cpd00117+cpd00024=cpd00020+cpd00186 |
| 2.6.1.30 | -2.68    | -0.28 | 0.00  | 2.40     | cpd00419+cpd00020=cpd00215+cpd00035 |
| 2.6.1.35 | 4.64     | 2.06  | 0.00  | 2.58     | cpd00033+cpd00032=cpd00040+cpd00041 |
| 2.6.1.37 | -0.03    | 0.69  | 0.00  | 0.72     | cpd02233+cpd00020=cpd02024+cpd00035 |
| 2.6.1.39 | 1.97     | -0.17 | 0.00  | 2.15     | cpd00705+cpd00024=cpd00269+cpd00023 |
| 2.6.1.42 | -1.98    | -0.79 | 0.20  | 1.19     | cpd00107+cpd00024=cpd00200+cpd00023 |
| 2.6.1.42 | -5.17    | -0.71 | 0.00  | 4.46     | cpd00156+cpd00024=cpd03737+cpd00023 |
| 2.6.1.5  | 3.57     | -0.41 | 0.02  | 3.97     | cpd00066+cpd00024=cpd00143+cpd00023 |
| 2.6.1.5  | -2.27    | -0.29 | 0.01  | 1.98     | cpd00069+cpd00024=cpd00868+cpd00023 |
| 2.6.1.51 | 0.61     | -0.96 | 0.14  | 1.57     | cpd00035+cpd00145=cpd00054+cpd00020 |
| 2.6.1.52 | 1.55     | 2.54  | 0.00  | 0.99     | cpd00738+cpd00024=cpd02069+cpd00023 |
| 2.6.1.52 | -1.55    | -3.15 | 0.38  | 1.60     | cpd02069+cpd00023=cpd00024+cpd00738 |
| 2.6.2.1  | -1.95    | 1.14  | 0.03  | 3.10     | cpd00041+cpd00024=cpd00032+cpd00023 |
| 2.7.1.1  | -0.11    | -5.36 | 0.40  | 5.24     | cpd00002+cpd00027=cpd00008+cpd00079 |
| 2.7.1.11 | -4.32    | -2.31 | 0.51  | 2.01     | cpd00002+cpd00072=cpd00008+cpd00290 |
| 2.7.1.23 | -2.88    | -2.71 | 0.00  | 0.17     | cpd00002+cpd00003=cpd00008+cpd00006 |
| 2.7.1.24 | 6.54     | 1.75  | 0.00  | 4.79     | cpd00002+cpd00655=cpd00008+cpd00010 |
| 2.7.1.40 | 7.88     | 6.46  | 0.44  | 1.43     | cpd00002+cpd00020=cpd00008+cpd00061 |
| 2.7.1.40 | 7.88     | 6.03  | 0.93  | 1.86     | cpd00002+cpd00020=cpd00061+cpd00008 |
| 2.7.1.6  | -1.60    | -3.55 | 0.15  | 1.94     | cpd00002+cpd00108=cpd00008+cpd19025 |
| 2.7.2.2  | 10.13    | 3.73  | 0.47  | 6.40     | cpd00002+cpd01101=cpd00008+cpd00146 |
| 2.7.2.3  | -1.68    | 4.80  | 0.28  | 6.49     | cpd00002+cpd00169=cpd00008+cpd00203 |
| 2.7.3.2  | -7.95    | 2.45  | 0.85  | 10.40    | cpd00002+cpd00250=cpd00008+cpd01550 |
| 2.7.3.3  | 8.45     | 0.20  | 1.05  | 8.26     | cpd00002+cpd00051=cpd00008+cpd03535 |
| 2.7.3.4  | -1.02    | -0.71 | 1.49  | 0.31     | cpd00002+cpd01345=cpd00008+cpd02015 |
| 2.7.3.5  | -5.27    | -1.77 | 0.00  | 3.49     | cpd00002+cpd09876=cpd00008+cpd09877 |

| EC       | DFT Expt    |       | Error | DFT-Expt | Reactions                           |
|----------|-------------|-------|-------|----------|-------------------------------------|
| 2.7.4.4  | -2.54       | 0.36  | 0.15  | 2.91     | cpd00002+cpd00014=cpd00008+cpd00062 |
| 2.7.4.6  | 4.62        | -0.02 | 0.00  | 4.65     | cpd00002+cpd00031=cpd00008+cpd00038 |
| 2.7.7.1  | -2.15       | -0.38 | 0.00  | 1.77     | cpd00002+cpd00355=cpd00003+cpd00012 |
| 2.7.7.12 | -1.55       | -0.68 | 0.00  | 0.87     | cpd19025=cpd00089                   |
| 2.7.7.12 | 0.86        | -0.25 | 0.27  | 1.11     | cpd00026+cpd19025=cpd00089+cpd00043 |
| 2.7.7.15 | -8.55       | 1.54  | 0.00  | 10.09    | cpd00052+cpd00457=cpd00012+cpd00256 |
| 2.7.7.27 | -8.58       | -1.05 | 0.00  | 7.53     | cpd00002+cpd00089=cpd00387+cpd00012 |
| 2.7.7.33 | 2.86        | -0.82 | 0.23  | 3.68     | cpd00052+cpd00089=cpd00390+cpd00012 |
| 2.8.3.5  | 6.61        | 1.66  | 0.49  | 4.96     | cpd00078+cpd00142=cpd00036+cpd00279 |
| 2.8.3.8  | -0.74       | 1.21  | 0.00  | 1.95     | cpd00022+cpd00142=cpd00279+cpd00029 |
| 3.1.1.21 | -3.41       | 5.13  | 0.00  | 8.53     | cpd01691+cpd00001=cpd00365+cpd00214 |
| 3.1.3.1  | -14.18-3.10 |       | 0.00  | 11.08    | cpd00018+cpd00001=cpd00182+cpd00009 |
| 3.1.3.1  | -5.60       | -3.25 | 0.14  | 2.34     | cpd00072+cpd00001=cpd00082+cpd00009 |
| 3.1.3.1  | -5.50       | -2.53 | 0.48  | 2.97     | cpd00079+cpd00001=cpd00027+cpd00009 |
| 3.1.3.1  | -2.02       | -2.99 | 0.00  | 0.97     | cpd00114+cpd00001=cpd00246+cpd00009 |
| 3.1.3.1  | -12.83-2.26 |       | 0.00  | 10.57    | cpd00235+cpd00001=cpd00138+cpd00009 |
| 3.1.3.1  | -1.29       | -3.11 | 0.00  | 1.82     | cpd00290+cpd00001=cpd00072+cpd00009 |
| 3.1.3.1  | -5.64       | -3.61 | 0.00  | 2.03     | cpd00290+cpd00001=cpd00802+cpd00009 |
| 3.1.3.1  | -1.24       | -2.62 | 0.00  | 1.38     | cpd00802+cpd00001=cpd00082+cpd00009 |
| 3.1.3.1  | -3.00       | -2.77 | 0.00  | 0.22     | cpd00818+cpd00001=cpd00108+cpd00009 |
| 3.1.3.1  | 5.97        | -2.41 | 0.58  | 8.38     | cpd00738+cpd00001=cpd00054+cpd00009 |
| 3.1.3.11 | -1.29       | -4.57 | 0.64  | 3.28     | cpd00290+cpd00001=cpd00072+cpd00009 |
| 3.1.3.2  | -5.60       | -2.99 | 0.00  | 2.61     | cpd00072+cpd00001=cpd00082+cpd00009 |
| 3.1.3.2  | -1.29       | -1.94 | 0.00  | 0.65     | cpd00290+cpd00001=cpd00072+cpd00009 |
| 3.1.3.2  | -5.64       | -2.21 | 0.00  | 3.43     | cpd00290+cpd00001=cpd00802+cpd00009 |
| 3.1.3.2  | -1.24       | -2.70 | 0.00  | 1.45     | cpd00802+cpd00001=cpd00082+cpd00009 |
| 3.1.3.3  | 5.97        | -2.37 | 0.32  | 8.34     | cpd00738+cpd00001=cpd00054+cpd00009 |
| 3.1.3.5  | -14.18-3.08 |       | 0.00  | 11.10    | cpd00018+cpd00001=cpd00182+cpd00009 |
| 3.2.1.23 | -1.32       | -2.31 | 0.41  | 0.99     | cpd00208+cpd00001=cpd00108+cpd00027 |
| 3.2.1.23 | -3.07       | -2.57 | 0.42  | 0.50     | cpd04349+cpd00001=cpd00108+cpd00082 |
| 3.2.2.2  | -3.56       | -2.81 | 0.00  | 0.74     | cpd00246+cpd00001=cpd00226+cpd00105 |
| 3.2.2.4  | -2.54       | -3.07 | 0.00  | 0.53     | cpd00018+cpd00001=cpd00128+cpd00101 |
| 3.2.2.7  | 0.92        | -2.35 | 0.00  | 3.27     | cpd00182+cpd00001=cpd00128+cpd00105 |
| 3.3.1.1  | -3.03       | 8.30  | 0.00  | 11.33    | cpd00019+cpd00001=cpd00182+cpd00135 |
| 3.5.1.11 | 5.72        | -0.11 | 0.00  | 5.83     | cpd03325+cpd00001=cpd19069+cpd00033 |
| 3.5.1.11 | 2.08        | -1.14 | 0.52  | 3.22     | cpd04194+cpd00001=cpd01896+cpd02202 |
| 3.5.1.14 | 3.09        | -0.77 | 0.01  | 3.86     | cpd01756+cpd00001=cpd00029+cpd00060 |
| 3.5.1.14 | 3.09        | -0.63 | 0.00  | 3.72     | cpd01756+cpd00001=cpd00060+cpd00029 |
| 3.5.1.2  | -5.55       | -3.60 | 0.02  | 1.95     | cpd00053+cpd00001=cpd00023+cpd00013 |
| 3.5.1.22 | 1.78        | 1.65  | 0.15  | 0.13     | cpd00644+cpd00001=cpd00408+cpd00085 |

| EC       | DFT Expt |       | Error | DFT-Expt | Reactions                                    |
|----------|----------|-------|-------|----------|----------------------------------------------|
| 3.5.1.5  | -13.67   | -3.55 | 0.24  | 10.12    | cpd01101+cpd00001=cpd00013+cpd00242          |
| 3.5.1.a  | 0.74     | 3.18  | 1.05  | 2.44     | cpd08505+cpd00001=cpd00162+cpd00188          |
| 3.5.1.a  | 2.34     | 5.54  | 0.00  | 3.21     | cpd16300+cpd00001=cpd00162+cpd00214          |
| 3.5.3.4  | 8.05     | -0.27 | 0.00  | 8.32     | cpd00388+cpd00001=cpd00465+cpd00073          |
| 3.5.4.16 | -5.80    | -7.21 | 0.00  | 1.41     | cpd00038+cpd00001=cpd03518                   |
| 3.5.4.4  | -7.31    | -5.45 | 0.68  | 1.86     | cpd00182+cpd00001=cpd00246+cpd00013          |
| 3.6.1.38 | -5.61    | -6.45 | 0.00  | 0.84     | cpd00002+cpd00001=cpd00008+cpd00009          |
| 4.-      | -1.66    | -1.64 | 0.00  | 0.02     | cpd00216+cpd00013=cpd08210+cpd00001          |
| 4.1.2.-  | 11.27    | 6.10  | 0.00  | 5.17     | cpd03583=cpd00171+cpd00055                   |
| 4.1.2.13 | -1.82    | 3.52  | 0.64  | 5.34     | cpd00290=cpd00095+cpd00102                   |
| 4.1.2.13 | 2.88     | 7.40  | 0.33  | 4.52     | cpd00802=cpd00448+cpd00095                   |
| 4.1.2.14 | 8.31     | 3.13  | 0.11  | 5.18     | cpd02711=cpd00020+cpd00102                   |
| 4.1.2.17 | -3.28    | 4.73  | 0.00  | 8.02     | cpd00806=cpd00095+cpd00334                   |
| 4.1.2.18 | 2.58     | 4.73  | 0.00  | 2.14     | cpd00520=cpd00020+cpd00229                   |
| 4.1.2.18 | -0.59    | 5.40  | 0.00  | 5.99     | cpd03674=cpd00020+cpd00334                   |
| 4.1.2.19 | -4.88    | 1.53  | 0.00  | 6.42     | cpd00831=cpd00095+cpd00334                   |
| 4.1.2.2  | 3.94     | 4.64  | 0.00  | 0.70     | cpd02148=cpd00055+cpd00095                   |
| 4.1.2.21 | -1.81    | 2.55  | 0.00  | 4.36     | cpd00945=cpd00020+cpd00102                   |
| 4.1.2.4  | 3.12     | 4.97  | 0.14  | 1.85     | cpd00510=cpd00102+cpd00071                   |
| 4.1.2.43 | -11.27   | -6.10 | 0.00  | 5.17     | cpd00171+cpd00055=cpd03583                   |
| 4.1.2.a  | 5.96     | 4.38  | 0.00  | 1.59     | cpd00176=cpd00020+cpd00448                   |
| 4.1.3.1  | 0.66     | 2.50  | 1.03  | 1.83     | cpd00260=cpd00036+cpd00040                   |
| 4.1.3.16 | 7.12     | 2.59  | 0.39  | 4.53     | cpd00830=cpd00020+cpd00040                   |
| 4.1.3.22 | -0.61    | 0.25  | 0.77  | 0.86     | cpd01701=cpd00029+cpd00020                   |
| 4.1.3.27 | -5.59    | -1.90 | 0.02  | 3.69     | cpd00216+cpd00013=cpd17073+cpd00001          |
| 4.1.3.3  | 6.64     | 1.89  | 0.44  | 4.75     | cpd00232=cpd00492+cpd00020                   |
| 4.1.3.3  | 5.81     | 1.48  | 0.00  | 4.33     | cpd02155=cpd02219+cpd00020                   |
| 4.1.3.32 | 0.55     | 0.02  | 0.00  | 0.53     | cpd01705=cpd00141+cpd00020                   |
| 4.1.3.6  | -6.83    | -0.01 | 0.54  | 6.81     | cpd00137=cpd00029+cpd00032                   |
| 4.1.3.7  | -7.70    | -6.67 | 0.28  | 1.03     | cpd00032+cpd00022+cpd00001=cpd00137+cpd00010 |
| 4.1.99.1 | -3.52    | 5.32  | 0.24  | 8.84     | cpd00065+cpd00001=cpd00359+cpd00020+cpd00013 |
| 4.2.1.10 | -2.38    | -1.63 | 0.00  | 0.76     | cpd00699=cpd01716+cpd00001                   |
| 4.2.1.11 | 1.22     | -0.74 | 0.13  | 1.96     | cpd00482=cpd00061+cpd00001                   |
| 4.2.1.2  | -1.45    | -0.85 | 0.11  | 0.60     | cpd00106+cpd00001=cpd00130                   |
| 4.2.1.3  | 2.13     | 1.89  | 0.13  | 0.24     | cpd00137=cpd00331+cpd00001                   |
| 4.2.1.3  | -1.69    | -1.30 | 0.32  | 0.38     | cpd00260=cpd00137                            |
| 4.2.1.3  | 0.44     | 0.34  | 0.11  | 0.10     | cpd00260=cpd00331+cpd00001                   |
| 4.2.1.31 | 1.45     | 4.52  | 0.00  | 3.07     | cpd00386=cpd00996+cpd00001                   |
| 4.2.1.34 | 3.48     | 1.05  | 0.00  | 2.43     | cpd01701=cpd01194+cpd00001                   |
| 4.2.1.35 | 4.59     | 2.75  | 0.00  | 1.84     | cpd01700=cpd01502+cpd00001                   |

| EC       | DFT Expt |       | Error | DFT-Expt | Reactions                           |
|----------|----------|-------|-------|----------|-------------------------------------|
| 4.2.1.48 | -8.06    | -2.03 | 0.13  | 6.02     | cpd00186=cpd01512+cpd00001          |
| 4.2.1.85 | 4.19     | 0.99  | 0.65  | 3.20     | cpd01705=cpd00684+cpd00001          |
| 4.2.1.89 | 3.61     | -0.25 | 0.00  | 3.86     | cpd00266=cpd02543+cpd00001          |
| 4.3.1.1  | 0.25     | 3.79  | 0.31  | 3.55     | cpd00041=cpd00106+cpd00013          |
| 4.3.1.2  | 0.32     | 1.71  | 0.08  | 1.39     | cpd02273=cpd01194+cpd00013          |
| 4.3.2.1  | -3.28    | 3.51  | 0.00  | 6.79     | cpd02152=cpd00106+cpd00051          |
| 4.3.2.2  | 4.78     | 1.38  | 0.21  | 3.40     | cpd02375=cpd00106+cpd00018          |
| 4.3.2.2  | 6.62     | 1.01  | 0.00  | 5.61     | cpd19032=cpd00106+cpd02851          |
| 4.3.2.3  | -7.82    | 1.17  | 0.02  | 8.99     | cpd00465=cpd00040+cpd00073          |
| 4.4.1.5  | 5.79     | 5.62  | 0.00  | 0.17     | cpd02182=cpd00042+cpd00428          |
| 4.6.1.1  | -1.15    | 1.33  | 0.20  | 2.47     | cpd00002=cpd00446+cpd00012          |
| 5.1.1.1  | 0.02     | 0.02  | 0.08  | 0.00     | cpd00035=cpd00117                   |
| 5.1.1.10 | 1.77     | 0.00  | 0.00  | 1.77     | cpd00107=cpd01106                   |
| 5.1.1.3  | 0.01     | 0.00  | 0.00  | 0.01     | cpd00023=cpd00186                   |
| 5.1.1.5  | -0.23    | 0.00  | 0.00  | 0.23     | cpd00039=cpd00549                   |
| 5.1.1.7  | 1.45     | -0.40 | 0.00  | 1.85     | cpd00504=cpd00516                   |
| 5.1.1.8  | 0.07     | 0.01  | 0.00  | 0.06     | cpd00851=cpd02175                   |
| 5.1.3.1  | -7.71    | -0.28 | 0.29  | 7.43     | cpd00171=cpd00198                   |
| 5.1.3.10 | 9.32     | -0.16 | 0.00  | 9.48     | cpd02264=cpd02265                   |
| 5.1.3.15 | -7.55    | -0.31 | 0.00  | 7.24     | cpd19006=cpd00863                   |
| 5.1.3.18 | 9.31     | 0.40  | 0.00  | 8.90     | cpd00083=cpd01536                   |
| 5.1.3.2  | -1.55    | -0.66 | 0.02  | 0.88     | cpd19025=cpd00089                   |
| 5.1.3.2  | 2.41     | 0.71  | 0.04  | 1.70     | cpd00026=cpd00043                   |
| 5.1.3.4  | -7.01    | -0.12 | 0.17  | 6.89     | cpd00808=cpd00198                   |
| 5.1.3.5  | 6.13     | -0.03 | 0.09  | 6.16     | cpd00691=cpd00163                   |
| 5.1.3.6  | 5.03     | -0.26 | 0.27  | 5.29     | cpd00144=cpd00472                   |
| 5.1.3.8  | 9.38     | 0.89  | 0.09  | 8.49     | cpd00122=cpd00492                   |
| 5.1.3.9  | 9.17     | 0.52  | 0.00  | 8.65     | cpd00293=cpd02612                   |
| 5.2.1.5  | 0.37     | -2.52 | 0.00  | 2.88     | cpd01122=cpd02510                   |
| 5.3.1.-  | -4.92    | -3.17 | 0.00  | 1.75     | cpd03583=cpd00072                   |
| 5.3.1.1  | -4.70    | -1.88 | 0.13  | 2.82     | cpd00102=cpd00095                   |
| 5.3.1.10 | 2.53     | 0.89  | 0.03  | 1.65     | cpd00288+cpd00001=cpd00072+cpd00013 |
| 5.3.1.12 | -0.44    | 0.15  | 0.00  | 0.59     | cpd00164=cpd00672                   |
| 5.3.1.12 | -4.93    | 0.32  | 0.75  | 5.25     | cpd00280=cpd00437                   |
| 5.3.1.13 | 2.59     | 0.59  | 0.23  | 2.00     | cpd00817=cpd00171                   |
| 5.3.1.14 | -0.71    | -0.04 | 0.30  | 0.67     | cpd00396=cpd00642                   |
| 5.3.1.15 | -2.18    | 0.87  | 0.00  | 3.05     | cpd00368=cpd00259                   |
| 5.3.1.2  | -0.37    | -0.51 | 0.00  | 0.14     | cpd01239=cpd01383                   |
| 5.3.1.20 | 1.59     | 0.47  | 0.08  | 1.12     | cpd00105=cpd00258                   |
| 5.3.1.27 | -4.92    | -3.17 | 0.00  | 1.75     | cpd03583=cpd00072                   |

| EC       | DFT Expt |       | Error DFT-Expt |       | Reactions                                             |
|----------|----------|-------|----------------|-------|-------------------------------------------------------|
| 5.3.1.3  | 3.18     | 1.08  | 0.10           | 2.10  | cpd00185=cpd00258                                     |
| 5.3.1.3  | -6.84    | 1.30  | 0.00           | 8.14  | cpd00751=cpd01186                                     |
| 5.3.1.4  | 2.06     | 1.17  | 0.12           | 0.89  | cpd00224=cpd00397                                     |
| 5.3.1.5  | -0.92    | -0.05 | 0.07           | 0.86  | cpd00027=cpd00082                                     |
| 5.3.1.5  | -3.67    | 0.49  | 0.00           | 4.15  | cpd00027=cpd00138                                     |
| 5.3.1.5  | 3.57     | 0.87  | 0.17           | 2.70  | cpd00154=cpd00259                                     |
| 5.3.1.5  | 1.59     | 0.73  | 0.11           | 0.86  | cpd00185=cpd00105                                     |
| 5.3.1.5  | 3.18     | 1.59  | 0.24           | 1.60  | cpd00185=cpd00258                                     |
| 5.3.1.5  | -0.37    | -0.60 | 0.13           | 0.23  | cpd01239=cpd01383                                     |
| 5.3.1.5  | -0.20    | 0.05  | 0.10           | 0.25  | cpd01239=cpd03879                                     |
| 5.3.1.5  | -0.30    | -0.62 | 0.11           | 0.32  | cpd03884=cpd01055                                     |
| 5.3.1.5  | 3.81     | 0.80  | 0.00           | 3.02  | cpd03884=cpd03880                                     |
| 5.3.1.6  | 1.80     | 0.68  | 0.28           | 1.12  | cpd00101=cpd00171                                     |
| 5.3.1.7  | 2.75     | -0.60 | 0.09           | 3.35  | cpd00138=cpd00082                                     |
| 5.3.1.7  | -2.18    | 0.57  | 0.00           | 2.75  | cpd00368=cpd00259                                     |
| 5.3.1.8  | -4.49    | -0.14 | 0.27           | 4.35  | cpd00235=cpd00072                                     |
| 5.3.1.9  | -0.82    | 0.80  | 0.22           | 1.62  | cpd00079=cpd00072                                     |
| 5.3.2.1  | -5.96    | 1.36  | 0.00           | 7.33  | cpd00143=cpd01784                                     |
| 5.3.2.2  | 10.16    | 1.36  | 0.00           | 8.80  | cpd00032=cpd02469                                     |
| 5.3.3.2  | -7.24    | -1.17 | 0.00           | 6.07  | cpd00113=cpd00202                                     |
| 5.3.3.5  | -8.51    | -1.63 | 0.00           | 6.88  | cpd03222=cpd03221                                     |
| 5.3.3.6  | -3.59    | -0.75 | 0.00           | 2.85  | cpd01545=cpd00684                                     |
| 5.4.2.1  | -6.77    | -1.43 | 0.37           | 5.34  | cpd00482=cpd00169                                     |
| 5.4.2.2  | 1.09     | -1.71 | 0.03           | 2.80  | cpd00089=cpd00079                                     |
| 5.4.2.2  | 1.42     | 0.57  | 0.12           | 0.85  | cpd00288=cpd03671                                     |
| 5.4.2.3  | -11.48   | -1.10 | 0.00           | 10.38 | cpd02611=cpd00293                                     |
| 5.4.2.6  | 1.09     | -1.60 | 0.72           | 2.69  | cpd00089=cpd00079                                     |
| 5.4.2.8  | 1.09     | -0.20 | 0.00           | 1.29  | cpd00089=cpd00079                                     |
| 5.4.2.8  | -1.42    | -0.97 | 0.89           | 0.45  | cpd00485=cpd00235                                     |
| 5.4.3.2  | -3.01    | -1.11 | 0.13           | 1.90  | cpd00039=cpd00840                                     |
| 5.4.3.5  | 2.49     | 1.70  | 0.00           | 0.79  | cpd00404=cpd02448                                     |
| 5.4.99.1 | -1.88    | -1.39 | 0.00           | 0.48  | cpd02273=cpd00023                                     |
| 5.4.99.4 | 3.16     | 0.90  | 0.00           | 2.26  | cpd01876=cpd01545                                     |
| 5.4.99.6 | -5.59    | -1.32 | 0.00           | 4.27  | cpd00216+cpd00013=cpd17073+cpd00001                   |
| 5.4.99.6 | -5.04    | 0.23  | 0.13           | 5.27  | cpd00216=cpd00658                                     |
| 5.5.1.1  | 11.16    | 3.42  | 0.79           | 7.74  | cpd02536=cpd01630                                     |
| 5.5.1.3  | 5.59     | -2.40 | 0.00           | 7.99  | cpd02033=cpd02112                                     |
| 6.2.1.4  | -3.06    | 0.98  | 0.54           | 4.04  | cpd00038+cpd00036+cpd00010=cpd00031+cpd00009+cpd00078 |
| 6.3.1.2  | -0.06    | -4.38 | 0.38           | 4.33  | cpd00002+cpd00023+cpd00013=cpd00008+cpd00009+cpd00053 |
| 6.3.4.4  | 4.70     | 4.89  | 0.00           | 0.19  | cpd00038+cpd00114+cpd00041=cpd00031+cpd00009+cpd02375 |

| EC      | DFT   | Expt  | Error | DFT-Expt | Reactions                                             |
|---------|-------|-------|-------|----------|-------------------------------------------------------|
| 6.4.1.1 | -2.39 | -0.36 | 1.05  | 2.03     | cpd00002+cpd00020+cpd00242=cpd00008+cpd00009+cpd00032 |

## References

- (1) Alberty, R. A. Inverse Legendre Transform in Biochemical Thermodynamics: Illustrated with the Last Five Reactions of Glycolysis. *J. Phys. Chem. B* **2002**, *106*, 6594–6599.
- (2) Alberty, R. A. *Thermodynamics of Biochemical Reactions*; Wiley-Interscience, 2003.
- (3) cxcalc, ChemAxon (30 September 2020, date last accessed, <https://www.chemaxon.com>).
- (4) Noor, E.; Haraldsdóttir, H. S.; Milo, R.; Fleming, R. M. Consistent Estimation of Gibbs Energy Using Component Contributions. *PLOS Comput. Biol.* **2013**, *9*, e1003098.
